# Supplementary material
Source: HighWire-hosted journal article supplement (https://bmjopen.bmj.com/content/15/4/e091170)
Supplement: inline-supplementary-material-2 [file inline-supplementary-material-2.pdf]

## Appendix S2

## Excluded Studies Based on Full-text Review

| Excluded Studies                                                                                                                                                                                                                                                                                                                                                                      | Reason                 |
|---------------------------------------------------------------------------------------------------------------------------------------------------------------------------------------------------------------------------------------------------------------------------------------------------------------------------------------------------------------------------------------|------------------------|
| L. Faessler, S. Kofler, J. Wenke-Zobler, C. Brunner, P. Schäfer-Keller, S. De Geest, et al., The use of nurse-led care intervention to improve self-care abilities subsequently decreasing readmission in multimorbid hospitalized patients: A quasi-experimental study in a real-world setting. <i>Nursing Open</i> , 2023, <b>10</b> (6): p. 3787-3798.                             | Inpatient care         |
| S. Kaasalainen, A. Wickson-Griffiths, N. Akhtar-Danesh, K. Brazil, F. Donald, R. Martin-Misener, et al., The effectiveness of a nurse practitioner-led pain management team in long-term care: A mixed methods study <i>International Journal of Nursing Studies</i> , 2016, <b>62</b> : p. 156-167.                                                                                  | Long-term care setting |
| M. R. Birch, Reducing Hospital Readmissions Using a Nurse Practitioner Led Interprofessional Collaborative Management Model of Caring: A Feasibility Study, 2017, p. 1.                                                                                                                                                                                                               | No information         |
| C. Lynch, A. Wajnberg, M. Jacob, M. Basso Lipani, S. Bernstein, C. Colgan, et al. 2014: Intensive primary care for high readmission risk adults. <i>Journal of General Internal Medicine</i> , 2014, <b>29</b> : p. S488-S489.                                                                                                                                                        | No information         |
| M. S. Schmaderer, Zimmerman, L., Hertzog, M., Pozehl, B., & Paulman, A., Correlates of patient activation and acute care utilization among multimorbid patients. <i>Western Journal of Nursing Research</i> , 2016, <b>38</b> (10): p. 1335-1353.                                                                                                                                     | No information         |
| L. A. Struwe, Schmaderer, M. S., & Zimmerman, L., Changes in patient activation in a self-management intervention. <i>Western Journal of Nursing Research</i> , 2020, <b>42</b> (3): p. 194-200.                                                                                                                                                                                      | No information         |
| C. L. Harvey, J. Sibley, J. Palmer, A. Phillips, E. Willis, R. Marshall, et al., Development, implementation and evaluation of nurse-led integrated, person-centred care with long-term conditions. <i>Journal of Integrated Care</i> , 2017, <b>25</b> (3): p. 186-195.                                                                                                              | No information         |
| C. S. Kwok, D. Jackson, S. Bennett, J. Tafuro, A. Large, C. D. Mallen, et al., An evaluation of the use of investigations in a nurse-led rapid access chest pain clinic. <i>British Journal of Cardiac Nursing</i> , 2021, <b>16</b> (12): p. 1-14.                                                                                                                                   | No multimorbidity      |
| Z. Zhu, S. Islam and S. R. Bergmann, Effectiveness and outcomes of a nurse practitioner-run chest pain evaluation unit. <i>Journal of the American Association of Nurse Practitioners</i> , 2016, <b>28</b> (11): p. 591-595.                                                                                                                                                         | No multimorbidity      |
| P. Bodenmann, V. S. Velonaki, J. L. Griffin, S. Baggio, K. Iglesias, K. Moschetti, et al., Case Management may Reduce Emergency Department Frequent use in a Universal Health Coverage System: A Randomized Controlled Trial. <i>J Gen Intern Med</i> , 2017, <b>32</b> (5): p. 508-515.                                                                                              | No multimorbidity      |
| D. Brooten, J. M. Youngblut, J. Deatrick, M. Naylor and R. York, Patient problems, advanced practice nurse (APN) interventions, time and contacts among five patient groups. <i>Journal of Nursing Scholarship</i> , 2003, <b>35</b> (1): p. 73-79.                                                                                                                                   | No multimorbidity      |
| M. A. Kotowycz, Cosman, T.L., Tartaglia, C., Afzal, R., Syal, R.P., Natarajan, M.K., Safety and feasibility of early hospital discharge in ST-segment elevation myocardial infarction – a prospective and randomized trial in low-risk primary percutaneous coronary intervention patients (the Safe-Depart Trial). <i>American Heart Journal</i> , 2010, <b>159</b> (1): p. 117-126. | No multimorbidity      |
| L. G. Carter, M., Magee, K., Fearon, A., Morgulis, I., Doucette, S., Sapp, J.L., Gray, C., Abdelwahab, A., Parkash, R., An integrated management approach to atrial                                                                                                                                                                                                                   | Nurses                 |

|                                                                                                                                                                                                                                                                                                                                                                           |        |
|---------------------------------------------------------------------------------------------------------------------------------------------------------------------------------------------------------------------------------------------------------------------------------------------------------------------------------------------------------------------------|--------|
| fibrillation. <i>Journal of the American Heart Association</i> , 2016, <b>5</b> (1): p. e002950.                                                                                                                                                                                                                                                                          |        |
| H. S. J. Chew, K. L. D. Sim, K. C. Choi and S. Y. Chair, Effectiveness of a nurse-led temporal self-regulation theory-based program on heart failure self-care: A randomized controlled trial. <i>International Journal of Nursing Studies</i> , 2021, <b>115</b> : p. 103872.                                                                                            | Nurses |
| E. A. Denver, M. Barnard, R. G. Woolfson and K. A. Earle, Management of uncontrolled hypertension in a nurse-led clinic compared with conventional care for patients with type 2 diabetes. <i>Diabetes care</i> , 2003, <b>26</b> (8): p. 2256-2260.                                                                                                                      | Nurses |
| G. Edgren, Anderson, J., Dolk, A., Torgerson, J., Nyberg, S., Skau, T., Forsberg, B. C., Werr, J., & Ohlen, G., A case management intervention targeted to reduce healthcare consumption for frequent Emergency Department visitors: Results from an adaptive randomized trial. <i>European Journal of Emergency Medicine</i> , 2016, <b>23</b> (5): p. 344-350.          | Nurses |
| F. P. García-Fernández, Arrabal-Orpez, M. J., Rodríguez-Torres, M. d. C., Gila-Selas, C., Carrascosa-García, I., & Laguna-Parras, J. M., Effect of hospital case-manager nurses on the level of dependence, satisfaction and caregiver burden in patients with complex chronic disease. <i>Journal of Clinical Nursing</i> , 2014, <b>23</b> (19-20), p. 2814–2821.       | Nurses |
| L. G. Gordon, A. J. Spooner, N. Booth, T.-R. Downer, A. Hudson, P. Yates, et al., Do nurse navigators bring about fewer patient hospitalizations? <i>Journal of Health Organization &amp; Management</i> , 2019, <b>33</b> (1): p. 51-62.                                                                                                                                 | Nurses |
| S. A. Grilo, A. J. Shallcross, G. Ogedegbe, T. Ogedosu, N. Levy, S. Lehrer, et al., Food insecurity and effectiveness of behavioral interventions to reduce blood pressure, New York City, 2012-2013. <i>Prev Chronic Dis</i> , 2015, <b>12</b> : p. E16.                                                                                                                 | Nurses |
| T. F. Hendriks J, van Asselt T, Crijns H, & Vrijhoef H., Cost-effectiveness of a specialized atrial fibrillation clinic vs. usual care in patients with atrial fibrillation. <i>Europace</i> , 2013, <b>15</b> (8): p. 1128– 1135.                                                                                                                                        | Nurses |
| S. Houweling, N. Kleefstra, K. Van Hateren, A. Kooy, K. Groenier, E. Ten Vergert, et al., Diabetes specialist nurse as main care provider for patients with type 2 diabetes. <i>Neth J Med</i> , 2009, <b>67</b> (7), p. 279-84.                                                                                                                                          | Nurses |
| K. Hyrkas, & Wiggins, M., A comparison of usual care, a patient-centred education intervention and motivational interviewing to improve medication adherence and readmissions of adults in an acute-care setting. <i>Journal of Nursing Management</i> , 2014, <b>22</b> (3): p. 350-361.                                                                                 | Nurses |
| C. Jackson, Kasper, E. W., Williams, C., & DuBard, C. A., Incremental benefit of a home visit following discharge for patients with multiple chronic conditions receiving transitional care. <i>Population Health Management</i> , 2016, <b>19</b> (3): p. 163-170.                                                                                                       | Nurses |
| Y. Jiang, K. W. L. Koh, H. J. Ramachandran, H. D. Nguyen, D. S. Lim, Y. K. Tay, et al., The effectiveness of a nurse-led home-based heart failure self-management programme (the HOM-HEMP) for patients with chronic heart failure: A three-arm stratified randomized controlled trial. <i>International Journal of Nursing Studies</i> , 2021, <b>122</b> : p. 104026.   | Nurses |
| Y. Jiang, S. Shorey, H. D. Nguyen, V. X. Wu, C. Y. Lee, L. F. Yang, et al., The development and pilot study of a nurse-led HOME-based HEart failure self-Management Programme (the HOM-HEMP) for patients with chronic heart failure, following Medical Research Council guidelines. <i>European Journal of Cardiovascular Nursing</i> , 2020, <b>19</b> (3), p. 212-222. | Nurses |
| N. Y. Ko, Lai, Y. Y., Liu, H. Y., Lee, H. C., Chang, C. M., Lee, N. Y., Ko, W. C., Impact of the nurse-led case management program with retention in care on mortality among people with HIV-1 infection: a prospective cohort study (Vol. 49). <i>International Journal of Nursing Studies</i> , 2012, <b>49</b> (6): p. 656–663.                                        | Nurses |

|                                                                                                                                                                                                                                                                                                                            |        |
|----------------------------------------------------------------------------------------------------------------------------------------------------------------------------------------------------------------------------------------------------------------------------------------------------------------------------|--------|
| L. Liang, Pan, Y., Wu, D., Pang, Y., Xie, Y., Fang, H., Effects of multidisciplinary team-based nurse-led transitional care on clinical outcomes and quality of life in patients with ankylosing spondylitis. <i>Asian Nurs. Res.</i> , 2019, <b>13</b> (2): p. 107-114.                                                   | Nurses |
| A. McLachlan, A. Kerr, M. Lee and N. Dalbeth, Nurse-led cardiovascular disease risk management intervention for patients with gout. <i>European Journal of Cardiovascular Nursing</i> , 2011, <b>10</b> (2): p. 94-100.                                                                                                    | Nurses |
| J. A. Mugarza, J. P. Wilding, A. Woodward, K. Hayden and G. V. Gill, Achieving blood pressure control in patients with type 2 diabetes and diabetic renal disease by a nurse-led protocol-based clinic. <i>The British Journal of Diabetes &amp; Vascular Disease</i> , 2008, <b>8</b> (6): p. 279-284.                    | Nurses |
| J. P. New, J. M. Mason, N. Freemantle, S. Teasdale, L. M. Wong, N. J. Bruce, et al., Specialist nurse-led intervention to treat and control hypertension and hyperlipidemia in diabetes (SPLINT) A randomized controlled trial. <i>Diabetes care</i> , 2003, <b>26</b> (8), p. 2250-2255.                                  | Nurses |
| J. S. Pritchard-Jones, C., McCaughan, G., Strasser, S, Feasibility, acceptability and safety of a nurse led hepatitis B clinic based in the community. <i>Collegian</i> , 2015, <b>22</b> (2): p. 233-240.                                                                                                                 | Nurses |
| L. Van den Wijngaart, A. Sieben, M. Van der Vlugt, F. De Leeuw and S. Bredie, A nurse-led multidisciplinary intervention to improve cardiovascular disease profile of patients. <i>Western Journal of Nursing Research</i> , 2015, <b>37</b> (6): p. 705-723.                                                              | Nurses |
| F. K. Y. C. Wong, S., K.Y., Chan, T.M.F, Evaluation of a nurse-led disease management programme for chronic kidney disease: a randomized controlled trial. <i>International Journal of Nursing Studies</i> , 2010, <b>47</b> (3): p. 268-278.                                                                              | Nurses |
| A. W. Woodward, M., Wilding, J., Gill, G., Improved glycemic control - an unintended benefit of a nurse-led cardiovascular risk reduction clinic. <i>Diabet. Med.</i> , 2005, <b>22</b> (9): p. 1272-1274.                                                                                                                 | Nurses |
| A. Woodward, M. Wallymahmed, J. Wilding and G. Gill, Successful cardiovascular risk reduction in Type 2 diabetes by nurse-led care using an open clinical algorithm. <i>Diabetic Medicine</i> , 2006, <b>23</b> (7): p. 780-787.                                                                                           | Nurses |
| L. D. Melton, et al., Prioritized post-discharge telephonic outreach reduces hospital readmissions for select high-risk patients. <i>American Journal of Managed Care</i> , 2012, <b>18</b> (12), p. 838-844.                                                                                                              | Nurses |
| S. K. Y. Chow, Wong, F.K.Y., A randomized controlled trial of a nurse-led case management programme for hospital-discharged older adults with co-morbidities. <i>Journal of Advanced Nursing</i> , 2014, <b>70</b> (10): p. 2257-2271.                                                                                     | Nurses |
| A. Ishani, Greer, N., Taylor, B. C., Kubes, L., Cole, P., Atwood, M., Clothier, B., & Ercan Fang, N., Effect of nurse case management compared with usual care on controlling cardiovascular risk factors in patients with diabetes: A randomized controlled trial. <i>Diabetes Care</i> , 2011, <b>34</b> : p. 1689-1694. | Nurses |
| H. Y. Liang, L. Hann Lin, C. Yu Chang, F. Mei Wu and S. Yu, Effectiveness of a Nurse-Led Tele-Homecare Program for Patients with Multiple Chronic Illnesses and a High Risk for Readmission: A Randomized Controlled Trial. <i>Journal of Nursing Scholarship</i> , 2021, <b>53</b> (2): p. 161-170.                       | Nurses |
| Q. Tu, Xiao, L. D., Ullah, S., Fuller, J., & Du, H., A transitional care intervention for hypertension control for older people with diabetes: A cluster randomized controlled trial. <i>Journal of Advanced Nursing</i> , 2020, <b>76</b> (10), p. 2696-2708.                                                             | Nurses |
| C. V. Jack BW, Anthony D, Greenwald JL, Sanchez GM, Johnson AE, Forsythe SR, O'Donnell JK, Paasche Orlow MK, Manasseh C, Martin S & Culpepper L., A reengineered hospital discharge program to decrease rehospitalization: a randomized trial. <i>Annals of Internal Medicine</i> , 2009, <b>150</b> : p. 178-187          | Nurses |
| R. A. Iles, D. S. Eley, D. G. Hegney, E. Patterson, J. Young, C. Del Mar, et al., Revenue effects of practice nurse-led care for chronic diseases. <i>Australian Health</i>                                                                                                                                                | Nurses |

|                                                                                                                                                                                                                                                                                                                                                                                   |              |
|-----------------------------------------------------------------------------------------------------------------------------------------------------------------------------------------------------------------------------------------------------------------------------------------------------------------------------------------------------------------------------------|--------------|
| Review, 2014, <b>38</b> (4): p. 363-369                                                                                                                                                                                                                                                                                                                                           |              |
| M. C. Lu, Guo, H. R., Livneh, H., Lin, M. C., Lai, N. S., & Tsai, T. Y., The effectiveness of nurse-led case management for patients with rheumatoid arthritis in Taiwan. <i>International Journal of Clinical Practice</i> , 2020, <b>74</b> (2): p. e13443.                                                                                                                     | Nurses       |
| I. Taveira, Belo, A., Cristino, M., Goes, A., Gomes, V., Macieira, C., Matos, S., Mendonça, H., Silva, T., Sobral, S., & Vicente, C., Case management: The beginning of a New Era in a peripheral portuguese hospital. <i>Professional Case Management</i> , 2019, <b>24</b> (4): p. 222– 225.                                                                                    | Nurses       |
| E. A. Coleman, Parry, C., Chalmers, S., Min, S.J., The care transitions intervention: results of a randomized controlled trial. <i>Arch. Intern. Med.</i> , 2006, <b>166</b> (17): p. 1822–1828.                                                                                                                                                                                  | Older adults |
| C. Condon, S. Lycan, P. Duncan and C. Bushnell, Reducing Readmissions After Stroke with a Structured Nurse Practitioner/Registered Nurse Transitional Stroke Program. <i>Stroke</i> , 2016, <b>47</b> (6): p. 1599-1604.                                                                                                                                                          | Older adults |
| G. Facchinetti, D'Angelo, D., Piredda, M., Petitti, T., Matarese, M., Oliveti, A., & De Marinis, M. G., Continuity of care interventions for preventing hospital readmission of older people with chronic diseases: A meta-analysis. <i>International Journal of Nursing Studies</i> , 2020, <b>101</b> : p. 103396.                                                              | Older adults |
| G. J. Hanson, Borah, B. J., Moriarty, J. P., Ransom, J. E., Naessens, J. M., & Takahashi, P. Y., Cost- effectiveness of a care transitions program in a multimorbid older adult cohort. <i>Journal of the American Geriatrics Society</i> , 2018, <b>66</b> (2): p. 297-301.                                                                                                      | Older adults |
| J. M. L. V. Hendriks, M., H.J., Crijns, H.J.G.M., Brunner-La Rocca, H.P., The effect of a nurse-led integrated chronic care approach on quality of life in patients with atrial fibrillation. <i>Europace</i> , 2014, <b>16</b> (4): p. 491-499.                                                                                                                                  | Older adults |
| D. L. Hummel, Hill, C., Shaw, J. G., Slightam, C., Asch, S. M., & Zulman, D. M., Nurse practitioner led intensive outpatient team: Effects on end- of- life care. <i>The Journal for Nurse Practitioners</i> , 2017, <b>13</b> (5): p. e245– e248.                                                                                                                                | Older adults |
| K. Ornstein, K. L. Smith, D. H. Foer, M. T. Lopez-Cantor and T. Soriano, To the hospital and back home again: a nurse practitioner-based transitional care program for hospitalized homebound people. <i>Journal of the American Geriatrics Society</i> , 2011, <b>59</b> (3): p. 544-551                                                                                         | Older adults |
| M. A. Steinman, Low, M., Balicer, R. D., & Shadmi, E., Impact of a nurse- based intervention on medication outcomes in vulnerable older adults. <i>BMC Geriatrics</i> , 2018, <b>18</b> (1): p. 2017.                                                                                                                                                                             | Older adults |
| B. Valdivieso, García- Sempere, A., Sanfélix- Gimeno, G., Faubel, R., Librero, J., Soriano, E., & Peiró, S., The effect of telehealth, telephone support or usual care on quality of life, mortality and healthcare utilization in elderly high- risk patients with multiple chronic conditions. A prospective study. <i>Medicina Clinica</i> , 2018, <b>151</b> (8), p. 308-314. | Older adults |
| A. Williams, E. Manias, D. Liew, H. Gock and A. Gorelik, Working with CALD groups: testing the feasibility of an intervention to improve medication self-management in people with kidney disease, diabetes, and cardiovascular disease. <i>Renal Society Australasia Journal</i> , 2012, <b>8</b> (2): p. 62-69.                                                                 | Older adults |
| M. Deschodt, Laurent, G., Cornelissen, L., Yip, O., Zúñiga, F., Denhaerynck, K., Briel, M., Karabegovic, A., & De Geest, S., Core components and impact of nurse-led integrated care models for home-dwelling older people: A systematic review and meta-analysis. <i>International Journal of Nursing Studies</i> , 2020, <b>105</b> : p. 103552.                                | Older adults |
| S. M. Rawl, Easton, K.L., Kwiatkowski, S., Zemen, D., Burczyk, B., Effectiveness of a nurse-managed follow-up program for rehabilitation patients after discharge. <i>Rehabil. Nurs. J.</i> , 1998, <b>23</b> (4): p. 204-209.                                                                                                                                                    | Older adults |

|                                                                                                                                                                                                                                                                                                                                                                                                                |                     |
|----------------------------------------------------------------------------------------------------------------------------------------------------------------------------------------------------------------------------------------------------------------------------------------------------------------------------------------------------------------------------------------------------------------|---------------------|
| H. Y. C. Cheng, S.Y., Wang, Q., Sit, J.W.H., Wong, E.M.L., Tang, S.W., Effects of a nurse-led heart failure clinic on hospital readmission and mortality in Hong Kong. <i>J. Geriatric Cardiol.</i> , 2016, <b>13</b> (5), p. 415-419.                                                                                                                                                                         | Older adults        |
| C. B. G. Berglund, E., Johansson, H., Bergenmar, M., Nurse-led outpatient clinics in oncology care - patient satisfaction, information and continuity of care. <i>Eur. J. Oncol. Nurs.</i> , 2015, <b>19</b> (6): p. 724-730.                                                                                                                                                                                  | Oncology Care       |
| A. Barea and S. Reeken, AN AUTONOMOUS NURSE-LED PSORIASIS CLINIC TO DELIVER PATIENT-CENTRED AND RESEARCHFOCUSED CARE. <i>Dermatological Nursing</i> , 2018, <b>17</b> (4): p. 28-32.                                                                                                                                                                                                                           | One chronic disease |
| D. Boville, M. Saran, J. K. Salem, L. Clough, R. R. Jones, S. M. Radwany, et al., <i>Nurs Econ</i> , 2007, <b>25</b> (6), p. 359-64.                                                                                                                                                                                                                                                                           | One chronic disease |
| R. Jittawadee, M. Porntip, M. Supreeda, M. Kathleen, V. Chukiat and K. Srun, Outcomes of an Advanced Practice Nurse-Led Continuing Care Program in People with Heart Failure. <i>Pacific Rim International Journal of Nursing Research</i> , 2019, <b>23</b> (1): p. 32-46.                                                                                                                                    | One chronic disease |
| D. F. Neff, E. Madigan and G. Narsavage, APN-Directed Transitional Home Care Model: achieving positive outcomes for patients with COPD. <i>Home Healthcare Nurse</i> , 2003, <b>21</b> (8): p. 543-550.                                                                                                                                                                                                        | One chronic disease |
| C. Albers-Heitner, M. Joore, R. Winkens, A. Lagro-Janssen, J. Severens and L. Berghmans, Cost-effectiveness of involving nurse specialists for adult patients with urinary incontinence in primary care compared to care-as-usual: An economic evaluation alongside a pragmatic randomized controlled trial. <i>Neurourology and urodynamics</i> , 2012, <b>31</b> (4): p. 526-534.                            | One chronic disease |
| J. M. Charlton, and, L. McKnight, JA, A pilot study comparing a type 1 nurse-led diabetes clinic with a conventional doctor-led diabetes clinic. <i>Eur. Diabetic Nurses J.</i> , 2004, <b>1</b> (1): p. 4.                                                                                                                                                                                                    | One chronic disease |
| J. A. Nathan, Pearce, L., Field, C., Dotesio-Eyres, N., Sharples, L.D., Cafferty, F., et al., A randomized controlled trial of follow-up of patients discharged from the hospital following acute asthma: best performed by specialist nurse or doctor? <i>Chest</i> , 2006, <b>130</b> (1): p. 51-57.                                                                                                         | One chronic disease |
| D. Boville, M. Saran, J. K. Salem, L. Clough, R. R. Jones, S. M. Radwany, et al., Perspectives in ambulatory care. An innovative role for nurse practitioners in managing chronic disease. <i>Nursing Economic\$,</i> 2007, <b>25</b> (6): p. 359-364.                                                                                                                                                         | One chronic disease |
| I. M. Eijkelberg, I. M. Mur-Veeman, C. Spreeuwenberg and R. L. Koppers, Patient focus groups about nurse-led shared care for the chronically ill. <i>Patient education and counseling</i> , 2002, <b>47</b> (4), p. 329-336.                                                                                                                                                                                   | Outpatient clinic   |
| J. K. Allen, C. R. Dennison-Himmelfarb, S. L. Szanton, L. Bone, M. N. Hill, D. M. Levine, et al., Community Outreach and Cardiovascular Health (COACH) Trial: a randomized, controlled trial of nurse practitioner/community health worker cardiovascular disease risk reduction in urban community health centers. <i>Circulation: Cardiovascular Quality &amp; Outcomes</i> , 2011, <b>4</b> (6): p. 595-602 | Outpatient clinic   |
| A. Bonner, K. Havas, C. Stone, J. Abel, M. Barnes, V. Tam, et al., A multimorbidity nurse practitioner-led clinic: Evaluation of health outcomes. <i>Collegian</i> , 2020, <b>27</b> (4): p. 430-436                                                                                                                                                                                                           | Outpatient clinic   |
| A. Bonner, K. Havas, V. Tam, C. Stone, J. Abel, M. Barnes, et al., An integrated chronic disease nurse practitioner clinic: Service model description and patient profile. <i>Collegian</i> , 2019, <b>26</b> (2): p. 227-234.                                                                                                                                                                                 | Outpatient clinic   |
| A. Craswell, T. Dwyer, D. Rossi, C. Armstrong and D. Akbar, Cost-effectiveness of Nurse Practitioner--Led Regional Titration Service for Heart Failure Patients. <i>Journal for Nurse Practitioners</i> , 2018, <b>14</b> (2): p. 105-111.                                                                                                                                                                     | Outpatient clinic   |
| R. Heale, S. Dahrouge, S. Johnston and J. E. Tranmer, Characteristics of Nurse Practitioner Practice in Family Health Teams in Ontario, Canada. <i>Policy, Politics &amp;</i>                                                                                                                                                                                                                                  | Outpatient clinic   |

|                                                                                                                                                                                                                                                                                                                                |                   |
|--------------------------------------------------------------------------------------------------------------------------------------------------------------------------------------------------------------------------------------------------------------------------------------------------------------------------------|-------------------|
| Nursing Practice, 2018, <b>19</b> (3/4): p. 72-81.                                                                                                                                                                                                                                                                             |                   |
| R. Heale, S. James and M. L. Garceau, A Multiple-Case Study in Nurse Practitioner-Led Clinics: An Exploration of the Quality of Care for Patients with Multimorbidity. Nursing Leadership, 2016, <b>29</b> (3): p. 37-45.                                                                                                      | Outpatient clinic |
| R. Heale, S. James, E. Wenghofer and M.-L. Garceau, Nurse practitioner's perceptions of the impact of the nurse practitioner-led clinic model on the quality of care of complex patients. Primary Health Care Research & Development, 2018, <b>19</b> (6): p. 553-560.                                                         | Outpatient clinic |
| R. Heale, E. Wenghofer, S. James and M.-L. Garceau, Quality of care for patients with diabetes and multimorbidity registered at nurse practitioner-led clinics. Canadian Journal of Nursing Research, 2018, <b>50</b> (1): p. 20-27.                                                                                           | Outpatient clinic |
| M. G. Jones, L. V. DeCherrie, Y. S. Meah, C. R. Hernandez, E. J. Lee, D. M. Skovran, et al., Using Nurse Practitioner Co-Management to Reduce Hospitalizations and Readmissions Within a Home-Based Primary Care Program. Journal for Healthcare Quality: Promoting Excellence in Healthcare, 2017, <b>39</b> (5): p. 249-258. | Outpatient clinic |
| K. Kilpatrick, V. Pichette and M. Jabbour, An interprofessional team that includes a nurse practitioner and patients with diabetes and chronic kidney disease. CANNT Journal, 2014, <b>24</b> (4), p. 11-18.                                                                                                                   | Outpatient clinic |
| D. Taylor, V. van der Merwe and W. van der Merwe, Nurse titration clinics to achieve rapid control of blood pressure. New Zealand Medical Journal, 2012, <b>125</b> (1355): p. 31-40.                                                                                                                                          | Outpatient clinic |
| A. J. Ter Maten-Speksnijder, J. Dwarswaard, P. L. Meurs and A. van Staa, Rhetoric or reality? What nurse practitioners do to provide self-management support in outpatient clinics: an ethnographic study. J Clin Nurs, 2016, <b>25</b> (21-22): p. 3219-3228.                                                                 | Outpatient clinic |
| C. Tofthagen, C. Visovsky, E. x. Ellen Eckelman, B. Clatterbuck, M. Leggatt and H. Buck, Starting a nurse-led clinic for patients with peripheral neuropathy. Nursing 2018, <b>48</b> (8): p. 39-42                                                                                                                            | Outpatient clinic |
| B. Woo, K. Koh, W. Zhou, T. Wei Lim, V. Lopez and W. Tam, Understanding the role of an advanced practice nurse through the perspectives of patients with cardiovascular disease: A qualitative study. J Clin Nurs, 2020, <b>29</b> (9-10), p. 1623-1634.                                                                       | Outpatient clinic |
| L. M. Ndosi M, Hale C, Quinn H, Ryan S, Emery P, et al., The outcome and cost-effectiveness of nurse-led care in people with rheumatoid arthritis: A multicenter randomized controlled trial. Annals of the Rheumatic Diseases, 2014, <b>73</b> (1), p. 1975-1982.                                                             | Outpatient clinic |
| J. K. Allen, C. R. D. Himmelfarb, S. L. Szanton and K. D. Frick, Cost-effectiveness of nurse practitioner/community health worker care to reduce cardiovascular health disparities. The Journal of cardiovascular nursing, 2014, <b>29</b> (4), p. 308.                                                                        | Primary care      |
| J. Carryer and S. Adams, Nurse practitioners as a solution to trans-formative and sustainable health services in primary health care: a qualitative exploratory study. Collegian, 2017, <b>24</b> (6), p. 525-531.                                                                                                             | Primary care      |
| D. Chan, S. Harris, P. Roderick, D. Brown and P. Patel, Nurse practitioner role, independent practice, and teamwork in primary care. BMC gastroenterology, 2009, <b>9</b> : 1-8.                                                                                                                                               | Primary care      |
| S. L. Dierick-van Daele AT, Metsemakers JF, Derckx EW, Spreeuwenberg C, &Vrijhoef HJ, Economic evaluation of nurse practitioners versus GPs in treating common conditions. British Journal of General Practice, 2010, <b>60</b> (570): p. e28-e35.                                                                             | Primary care      |
| R. D. Hemani A, Hill C, al-Ibrahim MS, A comparison of resource utilization in nurse practitioners and physicians. Eff Clin Pract, 1999, <b>2</b> : p. 258-265.                                                                                                                                                                | Primary care      |
| A. E. Kinnersley P, Parry K, Clement J, Archard L, Turton P, Stainthorpe A, Fraser                                                                                                                                                                                                                                             | Primary care      |



|                                                                                                                                                                                                                                                                                                                                                                              |                  |
|------------------------------------------------------------------------------------------------------------------------------------------------------------------------------------------------------------------------------------------------------------------------------------------------------------------------------------------------------------------------------|------------------|
| A, Butler CC, Rogers C, Randomized controlled trial of nurse practitioner versus general practitioner care for patients requesting "same day" consultations in primary care. <i>BMJ</i> , 2000, <b>320</b> : 1043-1048.                                                                                                                                                      |                  |
| N. Liu, Finkelstein, S. R., & Poghosyan, L., A new model for nurse practitioner utilization in primary care: Increased efficiency and implications. <i>Health Care Management Review</i> , 2014, <b>39</b> (1): p. 10-20.                                                                                                                                                    | Primary care     |
| J. A. Mallow, L. A. Theeke, E. Theeke and B. K. Mallow, The effectiveness of ml SMART: A nurse practitioner led technology intervention for multiple chronic conditions in primary care. <i>International Journal of Nursing Sciences</i> , 2018, <b>5</b> (2): p. 131-137.                                                                                                  | Primary care     |
| P. A. Morgan, Abbott, D. H., McNeil, R. B., & Fisher, D. A., Characteristics of primary care office visits to nurse practitioners, physician assistants and physicians in United States Veterans Health Administration facilities, 2005 to 2010: A retrospective cross-sectional analysis. <i>Human Resources for Health</i> , 2012, <b>10</b> (42): p. 1-8.                 | Primary care     |
| K. R. Mundinger MO, Lenz ER, Totten AM, Tsai WY, Cleary PD, Friedewald WT, Siu AL, Shelanski ML, Primary care outcomes in patients treated by nurse practitioners or physicians: a randomized trial, <i>JAMA</i> , 2000, <b>283</b> : p. 59-68.                                                                                                                              | Primary care     |
| L. Poghosyan, Boyd, D., & Knutson, A. R., Nurse practitioner role, independent practice, and teamwork in primary care. <i>Journal for Nurse Practitioners</i> , 2014, <b>10</b> (7), p. 472-479.                                                                                                                                                                             | Primary care     |
| A. E. Van Der Biezen M, Van Der Burgt R, Wensing M, & Laurant M, The impact of substituting general practitioners with nurse practitioners on resource use, production and healthcare costs during out-of-hours: A quasi-experimental study. <i>BMC Family Practice</i> , 2016, <b>17</b> (1): p. 132.                                                                       | Primary care     |
| D. A. Venning P, Roland M, Roberts C, & Leese B, Controlled trial comparing cost effectiveness of general practitioners and nurse practitioners in primary care. <i>British Medical Journal</i> , 2000, <b>320</b> : p. 1048-1053.                                                                                                                                           | Primary care     |
| J. Hill, Patient satisfaction in a nurse-led rheumatology clinic. <i>Journal of Advanced Nursing</i> , 1997, <b>25</b> (2): p. 347-354.                                                                                                                                                                                                                                      | Primary care     |
| B. G. Voogdt-Pruis HR, Gorgels APM, Kester ADM, Van Ree JW, Effectiveness of nurse-delivered cardiovascular risk management in primary care: A randomized trial. <i>Br J Gen Pract</i> , 2010, <b>60</b> : p. 40-46.                                                                                                                                                         | Primary care     |
| C. E. Fletcher, Copeland, L. A., Lowery, J. C., & Reeves, P. J., Nurse practitioners as primary care providers within the VHA. <i>Military Medicine</i> , 2011, <b>176</b> (7), p. 791-797.                                                                                                                                                                                  | Primary care     |
| A. R. Williams KS, Cooper NJ, Turner DA, Shaw C, Abrams KR, et al., Clinical and cost-effectiveness of a new nurse-led continence service: A randomized controlled trial. <i>British Journal General Practice</i> , 2005, <b>55</b> (518): p. 696-703.                                                                                                                       | Primary care     |
| M. Shumway, Boccellari, A., O'Brien, K. & Okin, R.L., Cost-effectiveness of clinical case management for ED frequent users: results of a randomized trial. <i>American Journal of Emergency Medicine</i> , 2007, <b>26</b> : p. 155-164.                                                                                                                                     | Psychiatric care |
| C. M. Abraham, A. A. Norful, P. W. Stone and L. Poghosyan, Cost-Effectiveness of Advanced Practice Nurses Compared to Physician-Led Care for Chronic Diseases: A Systematic Review. <i>Nursing Economic\$</i> , 2019, <b>37</b> (6): p. 293-305.                                                                                                                             | Review           |
| K. M. Davis, M. C. Eckert, A. Hutchinson, J. Harmon, G. Sharplin, S. Shakib, et al., Effectiveness of nurse-led services for people with chronic disease in achieving an outcome of continuity of care at the primary-secondary healthcare interface: A quantitative systematic review. <i>International Journal of Nursing Studies</i> , 2021, Vol. <b>121</b> : p. 103986. | Review           |
| F. Donald, K. Kilpatrick, K. Reid, N. Carter, D. Bryant-Lukosius, R. Martin-Misener, et al., Hospital to community transitional care by nurse practitioners: A                                                                                                                                                                                                               | Review           |

|                                                                                                                                                                                                                                                                                        |        |
|----------------------------------------------------------------------------------------------------------------------------------------------------------------------------------------------------------------------------------------------------------------------------------------|--------|
| systematic review of cost-effectiveness. <i>International Journal of Nursing Studies</i> 2015, <b>52</b> (1), p. 436-451.                                                                                                                                                              |        |
| P. Fichadiya, K. L. Then and J. A. Rankin, The Impact of Nurse Practitioners on Health Outcomes in Outpatient Heart Failure Management: A systematic review. <i>Canadian Journal of Cardiovascular Nursing</i> , 2021, <b>31</b> (2): p. 13-17.                                        | Review |
| M. I. R. Gonçalves, D. A. Mendes, S. Caldeira, E. Jesus and E. Nunes, Nurse-led care management models for patients with multimorbidity in hospital settings: A scoping review. <i>Journal of Nursing Management</i> , 2022, <b>30</b> (6): p. 1960-1973.                              | Review |
| K. Gordon, C. Steele Gray, K. N. Dainty, J. deLacy and E. Seto, Nurse-Led Models of Care for Patients with Complex Chronic Conditions: A Scoping Review. <i>Nursing Leadership</i> , 2019, <b>32</b> (3): p. 57-76.                                                                    | Review |
| A. Hobson and A. Curtis, Improving the care of veterans: The role of nurse practitioners in team-based population health management. <i>Journal of the American Association of Nurse Practitioners</i> , 2017, <b>29</b> (11): p. 644-650.                                             | Review |
| J. Y. Joo and M. F. Liu, Understanding Nurse-led Case Management in Patients with Chronic Illnesses: A Realist Review. <i>West J Nurs Res</i> , 2021, <b>43</b> (2): p. 182-195.                                                                                                       | Review |
| N. A. Martínez-González, S. Djalali, R. Tandjung, F. Huber-Geismann, S. Markun, M. Wensing, et al., Substitution of physicians by nurses in primary care: a systematic review and meta-analysis. <i>BMC Health Services Research</i> , 2014, <b>14</b> (1): p. 214-214.                | Review |
| J. L. McAfee, Developing an advanced practice nurse-led liver clinic. <i>Gastroenterology Nursing</i> , 2012, <b>35</b> (3): p. 215-224.                                                                                                                                               | Review |
| C. McParland, B. Johnston and M. Cooper, A mixed-methods systematic review of nurse-led interventions for people with multimorbidity. <i>Journal of Advanced Nursing</i> , 2022, <b>78</b> (12): p. 3930-3951.                                                                         | Review |
| A. Peart, Barton, C., Lewis, V., & Russell, G., A state-of-the-art review of the experience of care coordination interventions for people living with multimorbidity. <i>Journal of Clinical Nursing</i> , 2020, <b>29</b> (9-10): p. 1445-1456.                                       | Review |
| K. Radhakrishnan, The efficacy of tailored interventions for self-management outcomes of type 2 diabetes, hypertension or heart disease: a systematic review. <i>Journal of Advanced Nursing</i> , 2012, <b>68</b> (3): p. 496-510.                                                    | Review |
| K. L. Rush, L. Burton, K. Schaab and A. Lukey, The impact of nurse-led atrial fibrillation clinics on patient and healthcare outcomes: a systematic mixed studies review. <i>Eur J Cardiovasc Nurs</i> , 2019, <b>18</b> (7): p. 526-533.                                              | Review |
| P. Stark, Advancing Complex Case Management Competencies in a Health Care System. <i>Professional Case Management</i> , 2020, <b>25</b> (1): p. 19-25.                                                                                                                                 | Review |
| C. Stephen, S. McInnes and E. Halcomb, The feasibility and acceptability of nurse-led chronic disease management interventions in primary care: An integrative review. <i>Journal of Advanced Nursing</i> , 2018, <b>74</b> (2): p. 279-288.                                           | Review |
| H. Strand and D. Parker, Effectiveness of medical compared to multidisciplinary models of care for adult persons with pre-dialysis chronic kidney disease: a systematic review. <i>JBI Library of Systematic Reviews</i> , 2010, <b>8</b> (26): p. 1058-1087.                          | Review |
| T. L. Thompson and M. Dykeman, Nurse practitioners in Canadian heart failure clinics: evidence to support their presence on healthcare teams. <i>Nursing Leadership (Tor Ont)</i> , 2007, <b>20</b> (2): p. 80-93.                                                                     | Review |
| S. M. van Hooft, Been-Dahmen, J. M. J., Ista, E., van Staa, A. L., & Boeije, H. R. (2017): A realist review: What do nurse-led self-management interventions achieve for outpatients with a chronic condition? <i>Journal of Advanced Nursing</i> , 2017, <b>73</b> (6): p. 1255-1271. | Review |
| Q. M. Zhu, J. Liu, H. Y. Hu and S. Wang, Effectiveness of nurse-led early discharge planning programmes for hospital in patients with chronic disease or rehabilitation needs: a systematic review and meta-analysis. <i>Journal of Clinical</i>                                       | Review |



|                                                 |  |
|-------------------------------------------------|--|
| Nursing, 2015, <b>24</b> (19-20): p. 2993-3005. |  |
|-------------------------------------------------|--|
