# Supplementary material
Source: HighWire-hosted journal article supplement (https://bmjopen.bmj.com/content/15/4/e091170)
Supplement: inline-supplementary-material-3 [file inline-supplementary-material-3.pdf]

**Data extraction form**

**Main characteristic of the APN-led models of care included**

- 1. Author(s)
- 2. Publication Year
- 3. Title of study
- 4. Source origin/country of origin
- 5. Aims/purpose of the study
- 6. Study design
- 7. Hospital setting
- 8. Sample size
- 9. Age (mean years)
- 10. Concept (duration), core group (leadership), title of APN

**Scope of practice (SOP)**

- i.       predischarge SOP
- ii.       post discharge SOP
- iii.       bridging transition SOP

**Competencies**

- i.       direct clinical practice
- ii.       guidance and coaching,
- iii.       evidence-based practice
- iv.       leadership collaboration
- v.       ethical practice
- vi.       indirect practice

**Impact**

- i.       clinical outcomes
- ii.       patient outcomes
- iii.       system outcomes
